# Supplementary material for: Anatomical characterisation of three different psychosurgical targets in the subthalamic area: from the basal ganglia to the limbic system
Source: Research Square preprint supplement (doi:10.21203/rs.3.rs-2546607/v1), 2023-02-07

**Article title: Anatomical characterisation of three different psychosurgical targets in the subthalamic area: from the basal ganglia to the limbic system**

**Journal name: Brain Structure and Function**

**Author names: Marie des Neiges Santin1, Nicolas Tempier1, Hayat Belaid2, Matthieu Zenoni1, Sylvie Dumas3, Åsa Wallén-Mackenzie4, Eric Bardinet1, Christophe Destrieux5,6, Chantal François1, Carine Karachi1,7**

**Affiliations:**

**1 Sorbonne Université, Institut du Cerveau – Paris Brain Institute- ICM, Inserm, CNRS, APHP, Hôpital de la Pitié Salpêtrière, 75013 Paris, France**

**2 Hôpital Fondation Adolphe de Rothschild, Service de Neurochirurgie, 29 rue Manin, Paris, France**

**3 Oramacell, Paris, France**

**4 Uppsala University, Dept of Organism Biology, S-756 32 Uppsala, Sweden**

**5 UMR Inserm U1253, IBrain, Université de Tours, Tours, France**

**6 Université François Rabelais, Laboratoire d’Anatomie, Faculté de Médecine, Tours, France**

**7 AP-HP, Hôpital de la Pitié-Salpêtrière, Service de Neurochirurgie, Paris, France**

**E-mail address of the corresponding author: [carine.karachi@gmail.com](mailto:carine.karachi@gmail.com)**

**Supplementary method 1: Details for immunohistochemical methods**

Adjacent series of regularly interspaced sections (1/10, 500 µm) of human and monkey brains were immunohistochemically processed for tyrosine hydroxylase (TH) using a mouse monoclonal antibody (1/250, MAB318, Merck Millipore, Massachusetts, USA), for orexin A (OX) using a rabbit polyclonal antibody (1/2000, H-003-30, Phoenix Pharmaceuticals, Burlington, CA, USA) for anti-serotonin transporter (SERT) using a mouse monoclonal antibody (1/5000, MAB5618, Merck Millipore, Merck Millipore, Massachusetts, USA), for vesicular glutamate transporter 1 (VGluT1) using a guinea pig polyclonal antibody (1/2000, AB5905, Merck Millipore, Massachusetts, USA), for Choline Acetyltransferase (ChAT) using a goat anti-ChAT (1: 200, in PBS 0.1 M; Millipore), and for α type oestrogen receptors (ERα) using a rabbit polyclonal anti-Erα antibody (1/500, 06-935, Merck Millipore, Massachusetts, USA). Labelling with Erα antibody was performed since its distribution has been demonstrated in brain regions associated with emotional homeostatic behaviours such as the basal forebrain, amygdala, hippocampus and hypothalamus (Osterlund et al. 2000; Kruijver et al. 2002; Perez et al. 2004). Briefly, the sections were rinsed twice in PBS 0.1M (TBS 0.1M for vGluT1 immmunostaining) then treated with 20% Methanol and 3% H2O2 in PBS 0.1M (TBS 0.1M for VGluT1) for 20 min to block endogenous peroxidase activity then rinsed twice and preincubated in 0.3% Triton X-100 in PBS 0.1 M (TBS 0.1M for VGluT1) containing 33% normal serum and 3% bovine serum albumin (5% for VGluT1) for one hour at room temperature. After thorough washing in PBS 0.1M or TBS 0.1M, sections were incubated with the primary antibodies and 5% normal serum, 3% bovine serum albumin in 0.02% Thimerosal in PBS 0.1M (10% normal serum, 3% bovine serum albumin in 0.3% Triton X-100 in TBS 0.1M for VGluT1) for 48h at 4°C. After rinsing, sections were incubated with secondary antibodies from the appropriate species (1/250, Vector Laboratories, Burlington, CA, USA) in PBS 0.1M or TBS 0.1M. Peroxidase-conjugated anti-mouse, anti-rabbit or anti-guinea pig secondary antibody immunoreactivity was then visualized using an avidin–biotin complex kit (Vector Laboratories, Burlington, CA, USA) with diaminobenzidine (Sigma) as a chromogen. The antiserum specificity was confirmed in control experiments in which the primary antiserum was omitted.

Kruijver FP, Balesar R, Espila AM, Unmehopa UA, Swaab DF (2002) Estrogen receptor-alpha distribution in the human hypothalamus in relation to sex and endocrine status. J Comp Neurol 454(2):115-139. doi: 10.1002/cne.10416.

Osterlund MK, Keller E, Hurd YL (2000) The human forebrain has discrete estrogen receptor alpha messenger RNA expression: high levels in the amygdaloid complex. Neuroscience 95(2):333-342. doi: 10.1016/s0306-4522(99)00443-1.

Perez S, Sendera TJ, Kordower JH, Mufson EJ (2004) Estrogen receptor alpha containing neurons in the monkey forebrain: lack of association with calcium binding proteins and choline acetyltransferase. Brain Res 1019(1-2):55-63. doi: 10.1016/j.brainres.2004.05.101.

**Supplementary method 2: double TH and DAT immunohistochemical staining**

Sections were incubated for 3 days at 4°C with mouse anti-TH (product n°22941; Immunostar, Hudson, WI, USA) (1: 250) and rat anti-DAT (product n° MAB369 ; EMD Millipore Corporation, Temecula, CA, USA) (1: 7500). After rinses, sections were first incubated with biotinylated rabbit anti-rat (product n° BA-4001 ; Vector Laboratories, Burlingame, CA, USA) to amplify the DAT signal and then incubated in a solution containing 1:200 dilutions of Alexa Fluor 555 donkey anti-mouse (product n°A-31570 ; Molecular Probes, Life Technologies, Burlington, ON, Canada) and Dylight 488 Streptavidin (product n° 042-03-30-00 ; KPL, Inc., Gaithersburg, MD, USA). Sections were mounted, processed with autofluorescence eliminator reagent (product n° 2160; EMD Millipore Corporation) and coverslipped with Mowiol medium (product n° 475904; EMD Millipore Corporation). Sections were examined and imaged with a fluorescent Leica DM4000B microscope (Leica Microsystems, Nanterre, France). Two coronal sections at the level of the substantia nigra pars compacta and of the locus coeruleus in monkeys were also processed for double immunofluorescence to control for potential cross-reactivity of secondary antibodies.

**Supplementary Figure 1: Delineation of three surgical targets in the human subthalamic areas.** These regions were delineated on two anterior (ANT) and posterior (POST) coronal human sections stained for tyrosine hydroxylase. GPi, internal globus pallidus; H2, Forel’s field H2; MFB, medial forebrain bundle; MSR, medial subthalamic region; MTT, mammillothalamic tract; Sano, Sano triangle; SNc, substantia nigra pars compacta; Thal, thalamus; VTA, ventral tegmental area; ZI, zona incerta.


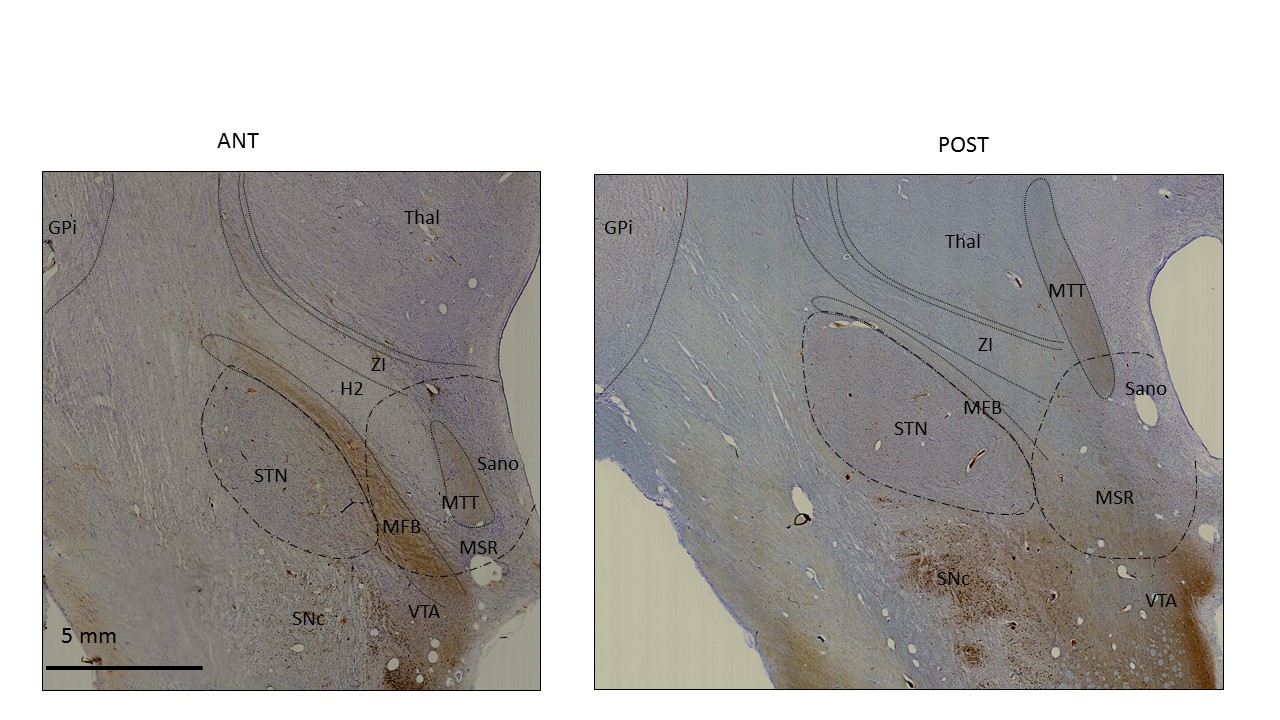

Supplement: Supplementary file 1 [file 55a677af8e8e91e2c06f4b3a.docx]
